# Supplementary material for: Development of a reliable questionnaire to assist in the diagnosis of fetal alcohol spectrum disorders (FASD)
Source: PubMed Central journal article supplement (PMC3680181; doi:10.1186/1471-2431-13-33), 2013-03-07
Supplement: 1471-2431-13-33-S1.pdf [file 1471-2431-13-33-S1.pdf]

DATE .....

CHILD ID.....

**THE LILILWAN PROJECT – INTERVIEW FORM**

**FILL IN BEFORE THE INTERVIEW STARTS - This page will be detached and stored separately so that the identity of the child and parent/carer is kept secret.**

Which community is the interview being conducted at? \_\_\_\_\_

**Names of person/people collecting information (interviewer/s):**

**First person:** \_\_\_\_\_

**Second person:** \_\_\_\_\_

**Name of study child:** \_\_\_\_\_

**Age and D.O.B. of study child:** \_\_\_\_\_

**Is child under DCP care?**       Yes  No    **If yes, DCP staff member must be at the interview.**

**If yes, Name of DCP staff member:** \_\_\_\_\_

**CONFIDENTIALITY**

The information you give us is confidential between you and the Lirilwan Project workers. What you say will be put only on this form without giving it to anyone else outside.

Every person doing these interviews had to sign a confidentiality form saying we are not allowed to tell anyone about what you have told us.

When we finish interviewing you, your name will be taken off and replaced with a number so nobody will know whose form it is. Your name or the child's name will not be used, only the number (ID number). The forms will be securely locked up.

**Name of person / people being interviewed (interviewee/s):**

What is the name of each person being interviewed, and how are each of you related to this child?

**First person**      **First name(s)** \_\_\_\_\_

**Last name(s)** \_\_\_\_\_

**Second person**      **First name(s)** \_\_\_\_\_

**Last name(s)** \_\_\_\_\_

**Relationship to child?**     Stepmother     Foster mother     Adoptive mother     Auntie     Grandmother     Sister  
 Birth father     Stepfather     Foster father     Adoptive father     Grandfather     Brother  
 Uncle     Cousin     Carer     DCP worker  
 Other (specify): \_\_\_\_\_

**Third Person**      **First name(s)** \_\_\_\_\_

**Last name(s)** \_\_\_\_\_

**Relationship to child?**     Stepmother     Foster mother     Adoptive mother     Auntie     Grandmother     Sister  
 Birth father     Stepfather     Foster father     Adoptive father     Grandfather     Brother  
 Uncle     Cousin     Carer     DCP worker  
 Other (specify): \_\_\_\_\_

**What language do you prefer to do the interview in?** \_\_\_\_\_

Is it OK to do the interview in English with the community navigator helping to explain the questions?

**If interpreter required what language/day/place/time has interview been booked for?** \_\_\_\_\_

DATE .....

CHILD ID.....

**PAGE 2**

**HAS BEEN LEFT BLANK INTENTIONALLY**

---

DATE .....

CHILD ID.....

**PART 1 – GENERAL INFORMATION ABOUT YOU AND YOUR FAMILY**

|                          |                                                                                        |                                                                                                                                                                                                                                                                                                                                                                                                                                                                                                                                                                                                                                                                                                                                                                                          |
|--------------------------|----------------------------------------------------------------------------------------|------------------------------------------------------------------------------------------------------------------------------------------------------------------------------------------------------------------------------------------------------------------------------------------------------------------------------------------------------------------------------------------------------------------------------------------------------------------------------------------------------------------------------------------------------------------------------------------------------------------------------------------------------------------------------------------------------------------------------------------------------------------------------------------|
| 1                        | Mother's details                                                                       | Mother's current age at time of interview: ____ years<br>How old are you now?<br>Date of birth: / /<br>What is your date of birth?                                                                                                                                                                                                                                                                                                                                                                                                                                                                                                                                                                                                                                                       |
| 2                        | Father's details                                                                       | Father's current age at time of interview: ____ years<br>How old is the father now?<br>Date of birth: / /<br>What is his date of birth?                                                                                                                                                                                                                                                                                                                                                                                                                                                                                                                                                                                                                                                  |
| 3                        | Study ID number: _____ Date of birth: / / _____                                        | Girl or Boy (circle)                                                                                                                                                                                                                                                                                                                                                                                                                                                                                                                                                                                                                                                                                                                                                                     |
| 4                        | Is this child of Aboriginal, Torres Strait or South Sea Islander origin?               | <input type="checkbox"/> Aboriginal<br><input type="checkbox"/> Torres Strait <input type="checkbox"/> South Sea Islander<br><input type="checkbox"/> Neither <input type="checkbox"/> Unknown<br><b>Go to next Q</b><br><b>Go to Q 10</b><br><b>Go to Q 10</b>                                                                                                                                                                                                                                                                                                                                                                                                                                                                                                                          |
| <b>IF ABORIGINAL</b>     |                                                                                        |                                                                                                                                                                                                                                                                                                                                                                                                                                                                                                                                                                                                                                                                                                                                                                                          |
| 5                        | What's the child's (biological) father's language group?                               | <input type="checkbox"/> Bunuba <input type="checkbox"/> Goonyandi <input type="checkbox"/> Walmajarri/ Wangkatjungka<br><input type="checkbox"/> Nykina <input type="checkbox"/> Unknown <input type="checkbox"/> Other (specify):                                                                                                                                                                                                                                                                                                                                                                                                                                                                                                                                                      |
| 6                        | What's your (the child's mother's) language group?                                     | <input type="checkbox"/> Bunuba <input type="checkbox"/> Goonyandi <input type="checkbox"/> Walmajarri/ Wangkatjungka<br><input type="checkbox"/> Nykina <input type="checkbox"/> Unknown <input type="checkbox"/> Other (specify):                                                                                                                                                                                                                                                                                                                                                                                                                                                                                                                                                      |
| 7                        | What's the child's language group?                                                     | <input type="checkbox"/> Bunuba <input type="checkbox"/> Goonyandi <input type="checkbox"/> Walmajarri/ Wangkatjungka<br><input type="checkbox"/> Nykina <input type="checkbox"/> Unknown <input type="checkbox"/> Other (specify):                                                                                                                                                                                                                                                                                                                                                                                                                                                                                                                                                      |
| 8                        | What's the main language this child speaks at home?                                    | <input type="checkbox"/> Bunuba <input type="checkbox"/> Goonyandi <input type="checkbox"/> Walmajarri/ Wangkatjungka<br><input type="checkbox"/> Nykina <input type="checkbox"/> Unknown <input type="checkbox"/> English<br><input type="checkbox"/> Kriol <input type="checkbox"/> Other (specify):                                                                                                                                                                                                                                                                                                                                                                                                                                                                                   |
| 9                        | What other languages does this child speak or understand?                              | <input type="checkbox"/> Bunuba <input type="checkbox"/> Goonyandi <input type="checkbox"/> Walmajarri/ Wangkatjungka<br><input type="checkbox"/> Nykina <input type="checkbox"/> Unknown <input type="checkbox"/> Kriol <input type="checkbox"/> English<br><input type="checkbox"/> Other (specify):<br><b>Now go to Q 14</b>                                                                                                                                                                                                                                                                                                                                                                                                                                                          |
| <b>IF NOT ABORIGINAL</b> |                                                                                        |                                                                                                                                                                                                                                                                                                                                                                                                                                                                                                                                                                                                                                                                                                                                                                                          |
| 10                       | Where were you (the child's mother) born?                                              | <input type="checkbox"/> Australia <input type="checkbox"/> Other (specify):                                                                                                                                                                                                                                                                                                                                                                                                                                                                                                                                                                                                                                                                                                             |
| 11                       | What is your ethnicity/cultural background?<br>(Where did your family originate from?) | <input type="checkbox"/> Australian <input type="checkbox"/> Pacific Islander <input type="checkbox"/> Maori <input type="checkbox"/> Middle Eastern<br><input type="checkbox"/> Chinese <input type="checkbox"/> Japanese <input type="checkbox"/> Filipino <input type="checkbox"/> Indonesian<br><input type="checkbox"/> Other Asian <input type="checkbox"/> African <input type="checkbox"/> Dutch <input type="checkbox"/> English<br><input type="checkbox"/> French <input type="checkbox"/> German <input type="checkbox"/> Italian <input type="checkbox"/> New Zealand<br><input type="checkbox"/> Scottish <input type="checkbox"/> Irish <input type="checkbox"/> Indian subcontinent<br><input type="checkbox"/> Latin American <input type="checkbox"/> Other (specify): |
| 12                       | Where was this child's (biological) father born?                                       | <input type="checkbox"/> Australia <input type="checkbox"/> Other (specify):                                                                                                                                                                                                                                                                                                                                                                                                                                                                                                                                                                                                                                                                                                             |
| 13                       | What is this child's father's ethnicity/cultural background?                           | <input type="checkbox"/> Australian <input type="checkbox"/> Pacific Islander <input type="checkbox"/> Maori <input type="checkbox"/> Middle Eastern<br><input type="checkbox"/> Chinese <input type="checkbox"/> Japanese <input type="checkbox"/> Filipino <input type="checkbox"/> Indonesian<br><input type="checkbox"/> Other Asian <input type="checkbox"/> African <input type="checkbox"/> Dutch <input type="checkbox"/> English<br><input type="checkbox"/> French <input type="checkbox"/> German <input type="checkbox"/> Italian <input type="checkbox"/> New Zealand<br><input type="checkbox"/> Scottish <input type="checkbox"/> Irish <input type="checkbox"/> Indian subcontinent<br><input type="checkbox"/> Latin American <input type="checkbox"/> Other (specify): |
| 14                       | Where does this child live mainly?                                                     | <input type="checkbox"/> Fitzroy Town <input type="checkbox"/> Bayulu <input type="checkbox"/> Noonkanbah<br><input type="checkbox"/> Wangkatjungka <input type="checkbox"/> Yakanarra <input type="checkbox"/> Unknown<br><input type="checkbox"/> Other (specify):                                                                                                                                                                                                                                                                                                                                                                                                                                                                                                                     |
| 15                       | Where will this child be mainly living in the dry season?                              | <input type="checkbox"/> Fitzroy Town <input type="checkbox"/> Bayulu <input type="checkbox"/> Noonkanbah<br><input type="checkbox"/> Wangkatjungka <input type="checkbox"/> Yakanarra <input type="checkbox"/> Unknown<br><input type="checkbox"/> Other (specify):                                                                                                                                                                                                                                                                                                                                                                                                                                                                                                                     |
| 16                       | Where will this child be mainly living in the wet season?                              | <input type="checkbox"/> Fitzroy Town <input type="checkbox"/> Bayulu <input type="checkbox"/> Noonkanbah<br><input type="checkbox"/> Wangkatjungka <input type="checkbox"/> Yakanarra <input type="checkbox"/> Unknown<br><input type="checkbox"/> Other (specify):                                                                                                                                                                                                                                                                                                                                                                                                                                                                                                                     |

DATE .....

CHILD ID.....

**PART 2 – SCHOOLING AND EDUCATION**

Now we want to ask about this child's schooling.

|    |                                                                                                                                                                                                                                                                                                       |                                                                                                                                                                                             |                                                                                                                                                                |                                         |                            |                                    |
|----|-------------------------------------------------------------------------------------------------------------------------------------------------------------------------------------------------------------------------------------------------------------------------------------------------------|---------------------------------------------------------------------------------------------------------------------------------------------------------------------------------------------|----------------------------------------------------------------------------------------------------------------------------------------------------------------|-----------------------------------------|----------------------------|------------------------------------|
| 17 | <b>What school does (CHILD) attend?</b><br>Which school does this child normally go to?                                                                                                                                                                                                               | <input type="checkbox"/> Fitzroy Crossing<br><input type="checkbox"/> Wangkatjungka<br><input type="checkbox"/> Other (specify):                                                            | <input type="checkbox"/> Bayulu<br><input type="checkbox"/> Yakanarra<br><input type="checkbox"/> None                                                         | <input type="checkbox"/> Noonkanbah     |                            |                                    |
| 18 | <b>What grade is (CHILD) in?</b><br>What grade is this child in at school now?                                                                                                                                                                                                                        | <input type="checkbox"/> Not at school<br><input type="checkbox"/> Grade 2<br><input type="checkbox"/> Other (specify):                                                                     | <input type="checkbox"/> Pre-school<br><input type="checkbox"/> Grade 3                                                                                        | <input type="checkbox"/> Grade 1        |                            |                                    |
| 19 | <b>What other school(s) does (CHILD) attend during different seasons?</b> (tick all that apply)<br>What other school(s) does this child sometimes go to (this year)?<br>(Tick all the other schools they go to)                                                                                       | <input type="checkbox"/> Fitzroy Crossing<br><input type="checkbox"/> Wangkatjungka<br><input type="checkbox"/> Other (specify):                                                            | <input type="checkbox"/> Bayulu<br><input type="checkbox"/> Yakanarra<br><input type="checkbox"/> None                                                         | <input type="checkbox"/> Noonkanbah     |                            |                                    |
| 20 | <b>How many schools has (CHILD) attended since starting school?</b><br>– not counting pre-school<br>How many schools has this child gone to since starting school?                                                                                                                                    | <input type="checkbox"/> 1                                                                                                                                                                  | <input type="checkbox"/> 2                                                                                                                                     | <input type="checkbox"/> 3              | <input type="checkbox"/> 4 | <input type="checkbox"/> 5 or more |
| 21 | <b>How often does (CHILD) attend school?</b><br>How often does this child attend school?                                                                                                                                                                                                              | <input type="checkbox"/> Not at all<br><input type="checkbox"/> Little bit (2-3 days/week)<br><input type="checkbox"/> Most days (4-5 days/week)                                            | <input type="checkbox"/> Not much (1 day/week)                                                                                                                 | <b>Go to next Q</b><br><b>Go to Q23</b> |                            |                                    |
| 22 | <b>If they attend school less than 4-5 days per week, why does (CHILD) miss school?</b> (tick all that apply)<br>Why is this child missing school? (maybe just one reason or more than one)                                                                                                           | <input type="checkbox"/> Family/personal reasons<br><input type="checkbox"/> Skipping school<br><input type="checkbox"/> School expulsion<br><input type="checkbox"/> Unknown<br>(specify): | <input type="checkbox"/> Illness<br><input type="checkbox"/> Suspension<br><input type="checkbox"/> Cultural reasons<br><input type="checkbox"/> Other reasons |                                         |                            |                                    |
| 23 | <b>Does (CHILD) receive learning or behaviour support at school?</b><br><b>Is (CHILD) in a special class?</b><br>Does this child have someone like a special education aide working with them in the classroom because they need extra help? If they do, how much of the time do they get extra help? | <input type="checkbox"/> No<br><input type="checkbox"/> Yes (specify what help they get):                                                                                                   | <input type="checkbox"/> Unknown                                                                                                                               |                                         |                            |                                    |

**PART 3 – YOUR PREGNANCIES AND BIRTHS**

Now we'd like to ask a bit about the times you have been pregnant. Is that ok?

|    |                                                                                                                                            |                                                                                                                                                                                                                                                                                             |                                                                   |                                  |
|----|--------------------------------------------------------------------------------------------------------------------------------------------|---------------------------------------------------------------------------------------------------------------------------------------------------------------------------------------------------------------------------------------------------------------------------------------------|-------------------------------------------------------------------|----------------------------------|
| 24 | <b>How many children have you given birth to altogether?</b><br>How many babies have you had altogether?                                   | Number:                                                                                                                                                                                                                                                                                     |                                                                   |                                  |
| 25 | <b>How many pregnancies have you had?</b><br>Did you lose any babies before they were born?<br>If you have, do you know why you lost them? | <input type="checkbox"/> Don't want to answer<br><input type="checkbox"/> Lost ___ babies before birth (number)<br><input type="checkbox"/> Miscarriage<br><input type="checkbox"/> Abortion / termination<br><input type="checkbox"/> Unknown<br><input type="checkbox"/> Other (specify): |                                                                   |                                  |
| 26 | <b>Was (CHILD) a twin or triplet or more?</b><br>Was this child a twin or triplet or more?                                                 | <input type="checkbox"/> No<br><input type="checkbox"/> Quadruplet                                                                                                                                                                                                                          | <input type="checkbox"/> Twin<br><input type="checkbox"/> Unknown | <input type="checkbox"/> Triplet |
| 27 | <b>How many children were born before (CHILD)?</b><br>How many of your children are older than this child?                                 | Number:                                                                                                                                                                                                                                                                                     |                                                                   |                                  |
| 28 | <b>How many children were born after (CHILD)?</b><br>How many of your children are younger than this child?                                | Number:                                                                                                                                                                                                                                                                                     |                                                                   |                                  |

Now we want to ask about when you were pregnant with this child. Is that ok?

|    |                                                                                                                                                          |                                                                                                                                  |                                                                                                           |                                     |
|----|----------------------------------------------------------------------------------------------------------------------------------------------------------|----------------------------------------------------------------------------------------------------------------------------------|-----------------------------------------------------------------------------------------------------------|-------------------------------------|
| 29 | <b>Where did you live when you were pregnant with (CHILD)?</b><br>Where were you living when you were pregnant with this child?<br>(tick all the places) | <input type="checkbox"/> Fitzroy Crossing<br><input type="checkbox"/> Wangkatjungka<br><input type="checkbox"/> Other (specify): | <input type="checkbox"/> Bayulu<br><input type="checkbox"/> Yakanarra<br><input type="checkbox"/> Unknown | <input type="checkbox"/> Noonkanbah |
| 30 | <b>Did you have any check ups during the pregnancy?</b><br>Did you have any check ups during the pregnancy?                                              | <input type="checkbox"/> Yes                                                                                                     | <input type="checkbox"/> No                                                                               | <input type="checkbox"/> Unknown    |
| 31 | <b>If yes, how far along in the pregnancy was the first check up?</b><br>If yes, how far along in the pregnancy was the first check up?                  | <input type="checkbox"/> First 3 months<br><input type="checkbox"/> Last 3 months                                                | <input type="checkbox"/> Second 3 months<br><input type="checkbox"/> Unknown                              |                                     |

DATE .....

CHILD ID.....

**ANTENATAL COMPLICATIONS:**

Any problems or special things during the pregnancy

|                         |                                                                                                                                              |                                                     |                              |                                  |                                  |
|-------------------------|----------------------------------------------------------------------------------------------------------------------------------------------|-----------------------------------------------------|------------------------------|----------------------------------|----------------------------------|
| 32                      | <b>Did you have any problems in the pregnancy with (CHILD)?</b><br>Did you have any problems in the pregnancy with this child?               | <input type="checkbox"/> Yes                        | <input type="checkbox"/> No  | <input type="checkbox"/> Unknown |                                  |
|                         | <b>If yes, what were the problems? (specify all that apply):</b><br>If yes, what problems did you have? - maybe one or more than one problem | High blood pressure                                 | <input type="checkbox"/> Yes | <input type="checkbox"/> No      | <input type="checkbox"/> Unknown |
|                         |                                                                                                                                              | Diabetes                                            | <input type="checkbox"/> Yes | <input type="checkbox"/> No      | <input type="checkbox"/> Unknown |
|                         |                                                                                                                                              | Premature rupture of membranes (waters broke early) | <input type="checkbox"/> Yes | <input type="checkbox"/> No      | <input type="checkbox"/> Unknown |
|                         |                                                                                                                                              | Infections                                          | <input type="checkbox"/> Yes | <input type="checkbox"/> No      | <input type="checkbox"/> Unknown |
|                         |                                                                                                                                              | Hospital admission                                  | <input type="checkbox"/> Yes | <input type="checkbox"/> No      | <input type="checkbox"/> Unknown |
|                         |                                                                                                                                              | Anaemia (low iron)                                  | <input type="checkbox"/> Yes | <input type="checkbox"/> No      | <input type="checkbox"/> Unknown |
| Other (Please specify): |                                                                                                                                              |                                                     |                              |                                  |                                  |

**OTHER ANTENATAL MEDICATIONS AND EXPOSURES:**

The next questions are about medicines and drugs in the pregnancy with this child

|                                                      |                                                                                                                                               |                              |                             |                                  |
|------------------------------------------------------|-----------------------------------------------------------------------------------------------------------------------------------------------|------------------------------|-----------------------------|----------------------------------|
| 33                                                   | <b>Were you on any medications during the pregnancy with (CHILD)?</b><br>Did you take any medicines during the pregnancy with this child?     | <input type="checkbox"/> Yes | <input type="checkbox"/> No | <input type="checkbox"/> Unknown |
|                                                      | Iron supplements / Iron medicine?                                                                                                             | <input type="checkbox"/> Yes | <input type="checkbox"/> No | <input type="checkbox"/> Unknown |
|                                                      | Folic acid / Folic acid or folate?                                                                                                            | <input type="checkbox"/> Yes | <input type="checkbox"/> No | <input type="checkbox"/> Unknown |
|                                                      | Phenytoin (Dilantin) / The medicine for fits called Phenytoin (Dilantin)                                                                      | <input type="checkbox"/> Yes | <input type="checkbox"/> No | <input type="checkbox"/> Unknown |
|                                                      | Valproate (Epilim) / Another medicine for fits called Sodium Valproate (Epilim)                                                               | <input type="checkbox"/> Yes | <input type="checkbox"/> No | <input type="checkbox"/> Unknown |
|                                                      | Any other medication during this pregnancy?<br>Did you take any other medicines while you were pregnant with this child?                      | <input type="checkbox"/> Yes | <input type="checkbox"/> No | <input type="checkbox"/> Unknown |
| Please specify medication.<br>If yes, what medicine? |                                                                                                                                               |                              |                             |                                  |
| 34                                                   | <b>Did you smoke during this pregnancy?</b><br>Did you smoke while you were pregnant with this child?                                         | <input type="checkbox"/> Yes | <input type="checkbox"/> No | <input type="checkbox"/> Unknown |
| 35                                                   | <b>Did you chew tobacco during this pregnancy?</b><br>Did you chew tobacco while you were pregnant with this child?                           | <input type="checkbox"/> Yes | <input type="checkbox"/> No | <input type="checkbox"/> Unknown |
| 36                                                   | <b>Did you take any of these drugs during the pregnancy with (CHILD)?</b><br>Did you take any drugs like the ones below during the pregnancy? |                              |                             |                                  |
|                                                      | Methadone for heroin addiction                                                                                                                | <input type="checkbox"/> Yes | <input type="checkbox"/> No | <input type="checkbox"/> Unknown |
|                                                      | Marijuana (Ganja)                                                                                                                             | <input type="checkbox"/> Yes | <input type="checkbox"/> No | <input type="checkbox"/> Unknown |
|                                                      | Sniffing solvents e.g. petrol, paint thinner, deodorant spray                                                                                 | <input type="checkbox"/> Yes | <input type="checkbox"/> No | <input type="checkbox"/> Unknown |
|                                                      | Heroin                                                                                                                                        | <input type="checkbox"/> Yes | <input type="checkbox"/> No | <input type="checkbox"/> Unknown |
|                                                      | Cocaine                                                                                                                                       | <input type="checkbox"/> Yes | <input type="checkbox"/> No | <input type="checkbox"/> Unknown |
|                                                      | Speed or Ice                                                                                                                                  | <input type="checkbox"/> Yes | <input type="checkbox"/> No | <input type="checkbox"/> Unknown |
| Other (specify):                                     |                                                                                                                                               |                              |                             |                                  |

**ANTENATAL ALCOHOL EXPOSURE:**The next questions are about if you drank alcohol/grog before and during the pregnancy with this child, is that ok? Answering these questions might be a bit hard, but it's really important that you're honest about it. It's not about shame or blame, but about helping children who need help to be as good as they can be. If you start to feel upset we can stop.

|    |                                                                                                                                                                                                                                                                                          |                                                                                                                                                                                                                                                                                                                              |                             |                                  |
|----|------------------------------------------------------------------------------------------------------------------------------------------------------------------------------------------------------------------------------------------------------------------------------------------|------------------------------------------------------------------------------------------------------------------------------------------------------------------------------------------------------------------------------------------------------------------------------------------------------------------------------|-----------------------------|----------------------------------|
| 37 | <b>Did you drink any alcohol in the 3 months BEFORE the pregnancy with (CHILD)?</b><br>Did you drink any alcohol/grog in the 3 months BEFORE you were pregnant with this child?                                                                                                          | <input type="checkbox"/> Yes                                                                                                                                                                                                                                                                                                 | <input type="checkbox"/> No | <input type="checkbox"/> Unknown |
| 38 | <b>Did you drink any alcohol DURING this pregnancy?</b><br>Did you drink any alcohol/grog WHILE you were pregnant with this child?                                                                                                                                                       | <input type="checkbox"/> Yes                                                                                                                                                                                                                                                                                                 | <input type="checkbox"/> No | <input type="checkbox"/> Unknown |
| 39 | <b>If yes, in which trimester(s) was alcohol consumed (tick all that apply)</b><br>If you did drink, how far along in the pregnancy were you when you were drinking?<br>Did you drink in the first three months, the second three months, the last three months, or all the way through? | <input type="checkbox"/> First 3 months<br><input type="checkbox"/> Second 3 months<br><input type="checkbox"/> Last 3 months<br><input type="checkbox"/> During the entire pregnancy<br><input type="checkbox"/> Unknown                                                                                                    |                             |                                  |
| 40 | <b>What type of alcohol did you usually drink?</b><br>What type of alcohol/grog did you usually drink?<br>Use picture of local drink cans / bottles to specify:                                                                                                                          | <input type="checkbox"/> Full strength beer <input type="checkbox"/> Port/liqueur<br><input type="checkbox"/> Mid strength beer <input type="checkbox"/> Spirits<br><input type="checkbox"/> Light beer <input type="checkbox"/> Premixed spirits<br><input type="checkbox"/> Wine <input type="checkbox"/> Other (specify): |                             |                                  |

DATE .....

CHILD ID.....

|    |                                                                                                                                                                                                                             |                                                                                                                                                                                                                                                                                                                           |
|----|-----------------------------------------------------------------------------------------------------------------------------------------------------------------------------------------------------------------------------|---------------------------------------------------------------------------------------------------------------------------------------------------------------------------------------------------------------------------------------------------------------------------------------------------------------------------|
| 41 | <b>Were you drinking cans, bottles, glasses?</b><br>What size did you usually drink?<br>Use picture of local drink cups / cans / bottles                                                                                    | <input type="checkbox"/> Cans<br><input type="checkbox"/> Stubbies<br><input type="checkbox"/> Long necks<br><input type="checkbox"/> Schooner glass<br><input type="checkbox"/> Middy glass<br><input type="checkbox"/> Wine glass<br><input type="checkbox"/> Beer bottles<br><input type="checkbox"/> Other (specify): |
| 42 | <b>How many alcoholic drinks did you have on a typical day when drinking?</b><br>On the days when you did drink, how many drinks would you have on each day?                                                                | <input type="checkbox"/> 1 - 2 <input type="checkbox"/> 3 - 4 <input type="checkbox"/> 5 - 6<br><input type="checkbox"/> 7 - 9 <input type="checkbox"/> 10 or more <input type="checkbox"/> Unknown                                                                                                                       |
| 43 | <b>On average how often did you have a drink containing alcohol?</b><br>When pregnant with this child how often did you drink alcohol/grog?                                                                                 | <input type="checkbox"/> Never<br><input type="checkbox"/> Less than once a month<br><input type="checkbox"/> Once a month<br><input type="checkbox"/> Once every two weeks<br><input type="checkbox"/> Once a week<br><input type="checkbox"/> 2 or 3 times a week<br><input type="checkbox"/> Daily or almost daily     |
| 44 | <b>When you were pregnant, how often did you have 6 or more alcoholic drinks on one occasion?</b><br>During the whole pregnancy how often did you have 6 or more drinks of alcohol/grog at one time?                        | <input type="checkbox"/> Never<br><input type="checkbox"/> Less than once a month<br><input type="checkbox"/> Once a month<br><input type="checkbox"/> Once every 2 weeks<br><input type="checkbox"/> Once a week<br><input type="checkbox"/> 2 or 3 times a week<br><input type="checkbox"/> Daily or almost daily       |
| 45 | <b>Will you drink alcohol if you become pregnant again?</b><br>If you are pregnant again would you drink alcohol/grog during your pregnancy?                                                                                | <input type="checkbox"/> Yes<br><input type="checkbox"/> No<br><input type="checkbox"/> Don't know / maybe                                                                                                                                                                                                                |
| 46 | <b>How sure are you about your answers to these questions about alcohol?</b><br>We know it might be hard to remember about grog back before this child was born.<br>Can you say how sure you are about what you've told us? | <input type="checkbox"/> Very sure<br><input type="checkbox"/> Fairly sure<br><input type="checkbox"/> Not so sure                                                                                                                                                                                                        |

**PART 4 – THE BIRTH OF THIS CHILD**

Now we'd like to ask you about when this child was born.

|    |                                                                                                                                           |                                                                                                                                                                                                                                                                          |
|----|-------------------------------------------------------------------------------------------------------------------------------------------|--------------------------------------------------------------------------------------------------------------------------------------------------------------------------------------------------------------------------------------------------------------------------|
| 47 | <b>Where was (CHILD) born?</b><br>Where was this child born?                                                                              | <input type="checkbox"/> Derby <input type="checkbox"/> Fitzroy <input type="checkbox"/> Perth <input type="checkbox"/> Darwin<br><input type="checkbox"/> Other (specify):                                                                                              |
| 48 | <b>How was (CHILD) born?</b><br>How was this child born?                                                                                  | <input type="checkbox"/> Normal vaginal delivery <input type="checkbox"/> Vacuum extraction<br><input type="checkbox"/> Forceps<br><input type="checkbox"/> Elective Caesarean <input type="checkbox"/> Emergency Caesarean<br><input type="checkbox"/> Other (specify): |
| 49 | <b>How far along in the pregnancy were you when (CHILD) was born?</b><br>Was the child born early / at the due date / after the due date? | <input type="checkbox"/> Early (how early?) _____ weeks<br><input type="checkbox"/> Late (how late?) _____ weeks<br><input type="checkbox"/> On time<br><input type="checkbox"/> Unknown                                                                                 |



**PART 5 – GROWTH AND DEVELOPMENT – GROWING UP**

The next questions are about the child's development. Development means things like playing sport, writing, talking and making friends. We want to know if you think this child is different from the other children.

We also want to know if this child has been sick from the baby time upward. Is it OK to keep asking questions?

|    |                                                                                                                                                                                                                                                                                                                                        |                                                                                                                                                                                                                                                                                                                                                                                                                                                                                                                                                                                                                                                                          |
|----|----------------------------------------------------------------------------------------------------------------------------------------------------------------------------------------------------------------------------------------------------------------------------------------------------------------------------------------|--------------------------------------------------------------------------------------------------------------------------------------------------------------------------------------------------------------------------------------------------------------------------------------------------------------------------------------------------------------------------------------------------------------------------------------------------------------------------------------------------------------------------------------------------------------------------------------------------------------------------------------------------------------------------|
| 57 | <b>Does (CHILD) have any long-term medical problems requiring ongoing care, including mental health or behavioural problems?</b><br>Does this child have any long-term medical problems that need ongoing care, including mental health or behavioural problems?                                                                       | <input type="checkbox"/> Yes <b>If yes, go to next Q</b><br><input type="checkbox"/> No <input type="checkbox"/> Unknown<br><b>If no or unknown, go to Q 59</b>                                                                                                                                                                                                                                                                                                                                                                                                                                                                                                          |
| 58 | <b>If yes, specify the problem/s? (all that apply)</b><br>What kind of problems does this child have?<br>Please tell us about all the medical problems.<br>(Run through checklist)                                                                                                                                                     | Please specify:<br><input type="checkbox"/> Cardiovascular (heart)<br><input type="checkbox"/> Ear, nose and throat<br><input type="checkbox"/> Endocrine (like diabetes or hormones)<br><input type="checkbox"/> Gastrointestinal (inside stomach)<br><input type="checkbox"/> Neurological (brain, nerves, spine)<br><input type="checkbox"/> Respiratory / lung<br><input type="checkbox"/> Skin<br><input type="checkbox"/> Mental health or behavioural problems<br><input type="checkbox"/> Other (specify):                                                                                                                                                       |
| 59 | <b>What regular medicines does (CHILD) currently take?</b><br>Is this child taking any tablets or medicines for a long time?<br>If yes, what tablets or medicines do they take?                                                                                                                                                        | <input type="checkbox"/> None/no <input type="checkbox"/> Unknown<br><input type="checkbox"/> Yes (Please list):                                                                                                                                                                                                                                                                                                                                                                                                                                                                                                                                                         |
| 60 | <b>Has (CHILD) had any hospital admissions?</b><br>Has this child ever been in hospital? (apart from when they were born)                                                                                                                                                                                                              | <input type="checkbox"/> Yes <b>If yes, go to next Q</b><br><input type="checkbox"/> No <input type="checkbox"/> Unknown<br><b>If no or unknown, go to Q 62</b>                                                                                                                                                                                                                                                                                                                                                                                                                                                                                                          |
| 61 | <b>If yes, why was (CHILD) admitted, and which hospital/s?</b><br>If yes, why was this child admitted to hospital?<br>Which hospital were they in?                                                                                                                                                                                     | Problem:<br><br>Hospital/s:                                                                                                                                                                                                                                                                                                                                                                                                                                                                                                                                                                                                                                              |
| 62 | <b>Has (CHILD) had a serious head injury?</b><br>Has this child ever had a serious head injury?                                                                                                                                                                                                                                        | <input type="checkbox"/> Yes <b>If yes, go to next Q</b><br><input type="checkbox"/> No <input type="checkbox"/> Unknown<br><b>If no or unknown, go to Q 64</b>                                                                                                                                                                                                                                                                                                                                                                                                                                                                                                          |
| 63 | <b>If yes, what happened to (CHILD)?</b><br>If they had a head injury, what happened?                                                                                                                                                                                                                                                  | <input type="checkbox"/> Loss of consciousness ( <b>knocked out</b> )<br><input type="checkbox"/> Admitted to hospital<br><input type="checkbox"/> Skull fracture<br><input type="checkbox"/> Bleeding inside the head<br><input type="checkbox"/> Other (please specify):                                                                                                                                                                                                                                                                                                                                                                                               |
| 64 | <b>Has (CHILD) ever had have seizures (fits)?</b><br>Did this child ever have any fits?                                                                                                                                                                                                                                                | <input type="checkbox"/> Yes <b>If yes, go to next Q</b><br><input type="checkbox"/> No <input type="checkbox"/> Unknown<br><b>If no or unknown, go to Q 66</b>                                                                                                                                                                                                                                                                                                                                                                                                                                                                                                          |
| 65 | <b>Does (CHILD) have an ongoing seizure disorder?</b><br>Does this child have an ongoing problem with fits?                                                                                                                                                                                                                            | <input type="checkbox"/> Yes <input type="checkbox"/> No <input type="checkbox"/> Unknown                                                                                                                                                                                                                                                                                                                                                                                                                                                                                                                                                                                |
| 66 | <b>Is (CHILD)'s development behind other children their age?</b><br>Is this child behind other children in their age group?                                                                                                                                                                                                            | <input type="checkbox"/> Yes <b>If yes, go to next Q</b><br><input type="checkbox"/> No <input type="checkbox"/> Unknown<br><b>If no or unknown, go to Q 68</b>                                                                                                                                                                                                                                                                                                                                                                                                                                                                                                          |
| 67 | <b>If yes, in what areas is (CHILD) delayed? (please tick all that apply)</b><br>In what ways is this child behind? (tick all the ones that apply to this child)<br>Are there any other ways you think this child might be behind other children the same age?<br>(Clarify if child doesn't like doing it, or if they have difficulty) | <input type="checkbox"/> Gross motor ( <b>big muscles</b> ) – <b>running, jumping, throwing</b><br><input type="checkbox"/> Fine motor ( <b>small muscles</b> ) – <b>drawing, using a pencil, etc</b><br><input type="checkbox"/> Speech and language - <b>speaking and understanding language</b><br><input type="checkbox"/> Literacy – <b>writing or reading</b><br><input type="checkbox"/> Personal/social – <b>making friends</b><br><input type="checkbox"/> Cognitive - <b>thinking and learning</b><br><input type="checkbox"/> Vision / <b>seeing</b><br><input type="checkbox"/> Hearing / <b>hearing</b><br><input type="checkbox"/> Other (please specify): |



DATE .....

CHILD ID.....

| Has the child received therapy or help           |                                                                                                                                                                                                                                                                                    |                                                                                                                                                                                                                                                                                                                                                                                                                                                                                                                                                      |
|--------------------------------------------------|------------------------------------------------------------------------------------------------------------------------------------------------------------------------------------------------------------------------------------------------------------------------------------|------------------------------------------------------------------------------------------------------------------------------------------------------------------------------------------------------------------------------------------------------------------------------------------------------------------------------------------------------------------------------------------------------------------------------------------------------------------------------------------------------------------------------------------------------|
| List of referrals needed from the question above |                                                                                                                                                                                                                                                                                    |                                                                                                                                                                                                                                                                                                                                                                                                                                                                                                                                                      |
| 68                                               | <p><b>Has (CHILD) been diagnosed with a Fetal Alcohol Spectrum Disorder (FASD)?</b><br/> <i>Has anyone told you that this child has FASD?</i></p>                                                                                                                                  | <input type="checkbox"/> Yes <b>If yes, go to next Q</b><br><input type="checkbox"/> No <input type="checkbox"/> Unknown<br><b>If no or unknown, go to Q 73</b>                                                                                                                                                                                                                                                                                                                                                                                      |
| 69                                               | <p><b>If yes, what is the diagnosis?</b><br/> <i>What did they tell you this child has?</i></p>                                                                                                                                                                                    | <input type="checkbox"/> FAS<br><input type="checkbox"/> Partial FAS<br><input type="checkbox"/> Alcohol Related Birth Defects<br><input type="checkbox"/> Alcohol Related Neurodevelopmental Disorder<br><input type="checkbox"/> Unknown<br><input type="checkbox"/> Other (specify):                                                                                                                                                                                                                                                              |
| 70                                               | <p><b>Who made the diagnosis?</b><br/> <i>Who told you this child has FASD?</i></p>                                                                                                                                                                                                | <input type="checkbox"/> Hospital doctor <input type="checkbox"/> Children's doctor<br><input type="checkbox"/> Clinic nurse <input type="checkbox"/> Clinic doctor<br><input type="checkbox"/> Unknown <input type="checkbox"/> Other (specify):                                                                                                                                                                                                                                                                                                    |
| 71                                               | <p><b>Don't ask this question – we will get from records.</b><br/> <b>Who else was involved in making the diagnosis?</b></p>                                                                                                                                                       | Select all that apply<br><input type="checkbox"/> Children's doctor <input type="checkbox"/> Hospital doctor<br><input type="checkbox"/> Clinic nurse <input type="checkbox"/> Clinic doctor<br><input type="checkbox"/> Occupational Therapist <input type="checkbox"/> Physiotherapy<br><input type="checkbox"/> Psychologist <input type="checkbox"/> Social worker<br><input type="checkbox"/> Aboriginal Health Worker<br><input type="checkbox"/> Speech Therapy <input type="checkbox"/> Unknown<br><input type="checkbox"/> Other (specify): |
| 72                                               | <p><b>Don't ask this question – we will get from records.</b><br/> <b>What information was used to make the diagnosis (diagnostic criteria)? Specify all from health record.</b></p>                                                                                               | Assessment by:<br><input type="checkbox"/> Paediatrician <input type="checkbox"/> Occupational Therapist<br><input type="checkbox"/> Psychologist <input type="checkbox"/> Psychiatrist<br><input type="checkbox"/> Speech Therapist <input type="checkbox"/> Physiotherapist<br><input type="checkbox"/> Other (specify):                                                                                                                                                                                                                           |
| 73                                               | <p><b>Is (CHILD) registered with the Disability Services Commission or another disability organisation?</b><br/> <i>If the child has a disability, are they registered with Disability Services?</i></p>                                                                           | <input type="checkbox"/> Yes: which organisation?<br><hr/> <input type="checkbox"/> No<br><input type="checkbox"/> Unknown<br><input type="checkbox"/> Other (specify):                                                                                                                                                                                                                                                                                                                                                                              |
| 74                                               | <p><b>Does the family receive Carer or Disability Allowance for (CHILD)? (Carer Allowance is a Centrelink benefit for caring for children with a disability or medical condition)</b><br/> <i>Do you get disability pay for looking after this child?</i></p>                      | <input type="checkbox"/> Yes (specify):<br><br><input type="checkbox"/> No<br><input type="checkbox"/> Unknown                                                                                                                                                                                                                                                                                                                                                                                                                                       |
| 75                                               | <p><b>Do any of your other biological children have a Fetal Alcohol Spectrum Disorder? If so, specify age, gender &amp; diagnosis.</b><br/> <i>Do any of your other birth children have FASD?</i><br/> <i>If they do, can you tell us their age, gender and the diagnosis?</i></p> | <input type="checkbox"/> Yes (specify age, gender and diagnosis of child / children): FAS / FASD / ARND / ARBD<br><hr/> <input type="checkbox"/> Suspected but not diagnosed (specify age and gender of child / children):<br><hr/> <input type="checkbox"/> No <input type="checkbox"/> Don't know                                                                                                                                                                                                                                                  |

**PART 6 – ABOUT YOU AND THE FAMILY – BIRTH MOTHER'S DETAILS**

|    |                                                                                                                                                                                                      |                                                                                                                                                                                                                                                                                                    |
|----|------------------------------------------------------------------------------------------------------------------------------------------------------------------------------------------------------|----------------------------------------------------------------------------------------------------------------------------------------------------------------------------------------------------------------------------------------------------------------------------------------------------|
| 76 | <b>What level of school education did you reach?</b><br>What was your last year in school?                                                                                                           | <input type="checkbox"/> Primary <input type="checkbox"/> Year 10 <input type="checkbox"/> Year 11<br><input type="checkbox"/> Year 12 <input type="checkbox"/> TAFE <input type="checkbox"/> Unknown<br><input type="checkbox"/> Other (specify):                                                 |
| 77 | <b>Post-school study</b><br>Have you done any other study after school?                                                                                                                              | <input type="checkbox"/> Short courses / certificates<br><input type="checkbox"/> TAFE<br><input type="checkbox"/> Undergraduate degree<br><input type="checkbox"/> Postgraduate degree / diploma<br><input type="checkbox"/> No                                                                   |
| 78 | <b>Are there any medical conditions which run in your family or the birth father's family?</b><br>Is there any medical condition that runs in your family or the father's family?                    | <input type="checkbox"/> No<br><input type="checkbox"/> Unknown<br><input type="checkbox"/> Yes (specify):                                                                                                                                                                                         |
| 79 | <b>Do you have any medical problems?</b><br>Do you have any medical problem like diabetes or other sickness you see the doctor or nurse for?<br>If you do, what is the problem?                      | <input type="checkbox"/> No<br><input type="checkbox"/> Unknown<br><input type="checkbox"/> Yes (specify):                                                                                                                                                                                         |
| 80 | <b>Do you have any mental health issues?</b><br>Do you have any mental health problems like depression or something like that you see the doctor or nurse for?<br>If you do, what sort of problem?   | <input type="checkbox"/> No<br><input type="checkbox"/> Unknown<br><input type="checkbox"/> Yes (specify):                                                                                                                                                                                         |
| 81 | <b>Do you have any learning problems?</b><br>Do you have any problems learning or memorising things?                                                                                                 | <input type="checkbox"/> No<br><input type="checkbox"/> Unknown<br><input type="checkbox"/> Yes (specify):                                                                                                                                                                                         |
| 82 | <b>Do you currently smoke, drink alcohol or use any drugs?</b><br>Do you currently:      drink alcohol?<br>smoke cigarettes?<br>use any drugs?                                                       | Drink alcohol <input type="checkbox"/> Yes <input type="checkbox"/> No<br>Smoke cigarettes <input type="checkbox"/> Yes <input type="checkbox"/> No<br>Other drugs <input type="checkbox"/> Yes <input type="checkbox"/> No<br><br><input type="checkbox"/> No <input type="checkbox"/> Don't know |
| 83 | <b>Have you ever had an alcohol related hospital admission? Have you ever had to be admitted to hospital because of alcohol?</b>                                                                     | <input type="checkbox"/> Yes <input type="checkbox"/> No <input type="checkbox"/> Unknown                                                                                                                                                                                                          |
| 84 | <b>Have you ever had an alcohol related injury while intoxicated? Have you ever been injured while drunk?</b>                                                                                        | <input type="checkbox"/> No<br><input type="checkbox"/> Unknown<br><input type="checkbox"/> Yes (specify):                                                                                                                                                                                         |
| 85 | <b>Have you ever had an alcohol related disease? e.g. liver</b> Have you ever had a disease that the doctor said is because of alcohol - like a liver problem or any other problem inside your body? | <input type="checkbox"/> Yes <input type="checkbox"/> No <input type="checkbox"/> Unknown                                                                                                                                                                                                          |
| 86 | <b>Have you ever been diagnosed with alcohol dependency requiring treatment? Have you ever been told by a health worker that you are addicted to alcohol?</b>                                        | <input type="checkbox"/> Yes <input type="checkbox"/> No <input type="checkbox"/> Unknown                                                                                                                                                                                                          |
| 87 | <b>Do you have a Fetal Alcohol Spectrum Disorder?</b><br>Did anyone ever say you had a FASD?                                                                                                         | <input type="checkbox"/> Yes<br><input type="checkbox"/> No<br><input type="checkbox"/> Unknown<br><input type="checkbox"/> Suspected but not diagnosed / maybe                                                                                                                                    |
| 88 | <b>If yes, what is the diagnosis?</b><br>If yes, did they say what sort of FASD?                                                                                                                     | <input type="checkbox"/> Fetal Alcohol Syndrome<br><input type="checkbox"/> Partial FAS<br><input type="checkbox"/> ARND<br><input type="checkbox"/> Alcohol Related Birth Defects<br><input type="checkbox"/> Other<br><input type="checkbox"/> Unknown                                           |

**PART 7 – AT HOME / BRINGING UP THE CHILD**

The next questions are about things in your home that might have affected this child's growing up

|                                                                                                                                                                                                                                        |                                                                                                                                                                                                                  |                                                                                                                                                                                                                                                                                                                                                                                                                                                                                            |
|----------------------------------------------------------------------------------------------------------------------------------------------------------------------------------------------------------------------------------------|------------------------------------------------------------------------------------------------------------------------------------------------------------------------------------------------------------------|--------------------------------------------------------------------------------------------------------------------------------------------------------------------------------------------------------------------------------------------------------------------------------------------------------------------------------------------------------------------------------------------------------------------------------------------------------------------------------------------|
| 89                                                                                                                                                                                                                                     | <b>How many people (adults and children) usually live with (CHILD)?</b><br>How many people (adults and children) usually live in the same house as this child?                                                   | Number:                                                                                                                                                                                                                                                                                                                                                                                                                                                                                    |
| 90                                                                                                                                                                                                                                     | <b>Which adult/s usually lives with (CHILD)? (select all that apply)</b><br>Which adults usually live in the same house as this child? (Tick all those that apply)                                               | <input type="checkbox"/> Birth mother <input type="checkbox"/> Birth father<br><input type="checkbox"/> Foster carers <input type="checkbox"/> Adoptive family<br><input type="checkbox"/> Other (specify)                                                                                                                                                                                                                                                                                 |
| 91                                                                                                                                                                                                                                     | <b>Unemployment of household members</b><br>Do any of those adults have jobs? (tick if any of them do)                                                                                                           | <input type="checkbox"/> Full time <input type="checkbox"/> Part time <input type="checkbox"/> CDEP<br><input type="checkbox"/> Volunteer <input type="checkbox"/> No-one works<br><input type="checkbox"/> Unknown                                                                                                                                                                                                                                                                        |
| 92                                                                                                                                                                                                                                     | <b>Family separation (parents splitting up)</b><br>Are this child's father and mother separated from each other?                                                                                                 | <input type="checkbox"/> Yes <input type="checkbox"/> No <input type="checkbox"/> Unknown                                                                                                                                                                                                                                                                                                                                                                                                  |
| 93                                                                                                                                                                                                                                     | <b>Who has been the adult most involved in growing up this (CHILD)? (please identify relationship to CHILD)</b><br>Who has been the main person growing up this child?                                           | <input type="checkbox"/> Mother <input type="checkbox"/> Father <input type="checkbox"/> Aunt <input type="checkbox"/> Uncle<br><input type="checkbox"/> Brother <input type="checkbox"/> Sister <input type="checkbox"/> Grandmother <input type="checkbox"/> Grandfather<br><input type="checkbox"/> Other relative (specify):<br><br>_____<br><input type="checkbox"/> Other person not a relative (specify relationship to child):<br><br>_____<br><input type="checkbox"/> Don't know |
| 94                                                                                                                                                                                                                                     | <b>How many homes has (CHILD) lived in since he/she was born?</b><br>How many places has this child lived in since they were born?                                                                               | Number:                                                                                                                                                                                                                                                                                                                                                                                                                                                                                    |
| 95                                                                                                                                                                                                                                     | <b>How important have cultural and traditional activities been in (CHILD'S) life?</b><br>How important have cultural and traditional activities like hunting, fishing and camping out been in this child's life? | <input type="checkbox"/> Very important<br><input type="checkbox"/> Pretty important<br><input type="checkbox"/> Not important<br><input type="checkbox"/> Don't know                                                                                                                                                                                                                                                                                                                      |
| 96                                                                                                                                                                                                                                     | <b>Is this a good community or neighbourhood for children where they can feel safe?</b><br>Is this a good community for children where they feel safe?                                                           | <input type="checkbox"/> Yes <input type="checkbox"/> No <input type="checkbox"/> Unknown                                                                                                                                                                                                                                                                                                                                                                                                  |
| 97                                                                                                                                                                                                                                     | <b>Are there good places for children to play in this community?</b><br>Are there good, safe places for children to go in this community?                                                                        | <input type="checkbox"/> Yes <input type="checkbox"/> No <input type="checkbox"/> Unknown                                                                                                                                                                                                                                                                                                                                                                                                  |
| These next few questions are about things that could have made the child worry or feel sad while they were growing up. We know these questions might be hard for you. Is it OK to keep going? This is nearly the end of the interview. |                                                                                                                                                                                                                  |                                                                                                                                                                                                                                                                                                                                                                                                                                                                                            |
| 98                                                                                                                                                                                                                                     | <b>Household worries about money</b><br>Are there times when adults in this child's house worry about not having enough money?                                                                                   | <input type="checkbox"/> Yes <input type="checkbox"/> No <input type="checkbox"/> Unknown                                                                                                                                                                                                                                                                                                                                                                                                  |
| 99                                                                                                                                                                                                                                     | <b>Not enough food</b><br>Are there times when adults in this child's house worry about not having enough food?                                                                                                  | <input type="checkbox"/> Yes <input type="checkbox"/> No <input type="checkbox"/> Unknown                                                                                                                                                                                                                                                                                                                                                                                                  |
| 100                                                                                                                                                                                                                                    | <b>Overcrowding of home</b><br>Do you think there are too many people living in this child's house?                                                                                                              | <input type="checkbox"/> Yes <input type="checkbox"/> No <input type="checkbox"/> Unknown                                                                                                                                                                                                                                                                                                                                                                                                  |
| 101                                                                                                                                                                                                                                    | <b>Domestic violence</b><br>Do adults or parents fight a lot at home?                                                                                                                                            | <input type="checkbox"/> Yes <input type="checkbox"/> No <input type="checkbox"/> Unknown                                                                                                                                                                                                                                                                                                                                                                                                  |
| 102                                                                                                                                                                                                                                    | <b>Household member going to jail</b><br>Has any family member close to this child been put in prison?                                                                                                           | <input type="checkbox"/> Yes <input type="checkbox"/> No <input type="checkbox"/> Unknown                                                                                                                                                                                                                                                                                                                                                                                                  |
| 103                                                                                                                                                                                                                                    | <b>Patterns of alcohol and drug taking by adults in the house</b><br>We want to ask about alcohol and drug taking by adults in the house                                                                         |                                                                                                                                                                                                                                                                                                                                                                                                                                                                                            |
|                                                                                                                                                                                                                                        | <b>Alcohol or other drug addiction</b><br>Is there anyone in the house who has to use alcohol or other drugs every day                                                                                           | <input type="checkbox"/> Yes <input type="checkbox"/> No <input type="checkbox"/> Unknown                                                                                                                                                                                                                                                                                                                                                                                                  |
|                                                                                                                                                                                                                                        | Has there been a problem with people bringing grog or drugs in the house so the child felt unsafe or lost sleep all the time?                                                                                    | <input type="checkbox"/> Yes <input type="checkbox"/> No <input type="checkbox"/> Unknown                                                                                                                                                                                                                                                                                                                                                                                                  |
| 104                                                                                                                                                                                                                                    | <b>Mental health problems</b><br>Is there anyone in the home who may have mental health problems like paranoid or depression or are mental health clients that need counselling?                                 | <input type="checkbox"/> Yes <input type="checkbox"/> No <input type="checkbox"/> Unknown                                                                                                                                                                                                                                                                                                                                                                                                  |
| 105                                                                                                                                                                                                                                    | <b>Unexpected death of a household member</b><br>Has any family member passed away that have made this child worry or feel sad?                                                                                  | <input type="checkbox"/> Yes <input type="checkbox"/> No <input type="checkbox"/> Unknown                                                                                                                                                                                                                                                                                                                                                                                                  |

DATE .....

CHILD ID.....

|     |                                                                                                                                       |                              |                                 |                                  |
|-----|---------------------------------------------------------------------------------------------------------------------------------------|------------------------------|---------------------------------|----------------------------------|
| 106 | Has Department for Child Protection been involved with (CHILD)?<br>Have DCP or welfare been involved with this child?                 | <input type="checkbox"/> Yes | <input type="checkbox"/> No     | <input type="checkbox"/> Unknown |
| 107 | If yes, is the involvement current or past?<br>If yes, are DCP involved now or was it before?                                         | <input type="checkbox"/> Now | <input type="checkbox"/> Before | <input type="checkbox"/> Unknown |
| 108 | Has (CHILD) been placed in foster care at any time?<br>Has welfare at any time taken this child away from you to live somewhere else? | <input type="checkbox"/> Yes | <input type="checkbox"/> No     | <input type="checkbox"/> Unknown |
| 109 | If yes, in how many foster homes has this child lived?<br>How many different families has welfare put this child with?                | Number:                      |                                 |                                  |

**PART 8 – THE LAST FEW QUESTIONS**

|     |                                                                                                                                                                         |                                                                                                                                                                                                                                                                                                                                                                                                                                                                                                                                                                                                 |
|-----|-------------------------------------------------------------------------------------------------------------------------------------------------------------------------|-------------------------------------------------------------------------------------------------------------------------------------------------------------------------------------------------------------------------------------------------------------------------------------------------------------------------------------------------------------------------------------------------------------------------------------------------------------------------------------------------------------------------------------------------------------------------------------------------|
| 110 | Where do you go for advice or information about looking after (CHILD)?<br>If you are worried about growing up your children, where do you go for advice or information? | <input type="checkbox"/> Media (eg. TV, magazine)<br><input type="checkbox"/> Nowhere or self<br><input type="checkbox"/> Partner or family member<br><input type="checkbox"/> Friends or neighbours<br><input type="checkbox"/> Women's resource centre<br><input type="checkbox"/> Karrayili<br><input type="checkbox"/> Nindilingarri<br><input type="checkbox"/> Centrelink<br><input type="checkbox"/> Health clinic or hospital<br><input type="checkbox"/> School<br><input type="checkbox"/> No-one<br><input type="checkbox"/> Don't know<br><input type="checkbox"/> Other (specify): |
| 111 | Are there any other things you would like to tell me about (CHILD)?<br>Are there any other things you would like to tell me about this child?                           |                                                                                                                                                                                                                                                                                                                                                                                                                                                                                                                                                                                                 |

Thank you so much for being part of this interview. We know some questions have been hard and it has taken a long time. Thank you for giving such personal information.

Nindilingarri, Marninwarntikura and other organisations will work hard to make sure this project helps all children in the Fitzroy Valley.

**CONFIDENTIALITY**

Remember, the information you give us is confidential between you and the Liliwan Project workers. What you say will be put only on this form without giving it to anyone else outside.

Every person doing these interviews had to sign a confidentiality form saying we are not allowed to tell anyone about what you have told us.

Names on this form will be taken off and replaced with a number so nobody will know whose form it is. Your name or the child's name will not be used, only the number (ID number).

**LAST QUESTION**

|     |                                                                                         |  |
|-----|-----------------------------------------------------------------------------------------|--|
| 112 | Were there any problems with this interview?<br>How do you think we could do it better? |  |
|-----|-----------------------------------------------------------------------------------------|--|

**COMMENTS FROM INTERVIEWER on anything that may be relevant to the accuracy or nature of the data collected from this interview?**

Interviewer to fill in at the end of questionnaire:

**How reliable was the source of information about antenatal alcohol exposure?**

- Very reliable – source was the birth mother who recalls her level of consumption well
- Very reliable – source is not the birth mother, who directly observed the mother drinking during pregnancy and recalls the level of consumption well
- Somewhat reliable – source is the birth mother who does not recall her consumption well
- Somewhat reliable – source is not the birth mother and is somewhat sure of the mother's consumption during pregnancy
- Alcohol use in pregnancy confirmed from medical records
- Not reliable – No reliable history or medical record information available
